# Supplementary material
Source: MDPI journal article supplement (https://www.mdpi.com/2306-5338/9/1/13)

# SUPPLEMENTARY MATERIALS S1

## Establishing stage-discharge rating curves in developing countries: Lake Tana basin, Ethiopia

Teshager A. Negatu, Fasikaw A. Zimale, Tammo S. Steenhuis

### S.1 Fitted polynomials of the offset as a function of time, constants and exponent of modified rating curves

Presented are the best-fit polynomials of the offsets with the 95% confidence intervals and the best fit coefficients for the modified rating curves (Eqs 3 and 4) for the 21 stations listed in Table 1 in the Lake Tana Basin. For completeness, the Gumara, Ribb, Gilgel Abbay and Megech are included. For all polynomials, time  $t=0$  is the year of the first measurement listed in Table 2.

| (a) Gumara at Woreta | n =          |       | Confidence @95% |           |                |
|----------------------|--------------|-------|-----------------|-----------|----------------|
|                      | C=9.087      | 1.917 |                 |           |                |
|                      | coefficients |       | 2.50%           | 97.50%    | standard error |
| Intercept            | 6.73E-01     |       | 4.80E-01        | 8.66E-01  | 9.76E-02       |
| X1                   | -1.33E-01    |       | -1.58E-01       | -1.07E-01 | 1.28E-02       |
| X2                   | 5.34E-03     |       | 4.45E-03        | 6.23E-03  | 4.50E-04       |
| X3                   | -4.80E-05    |       | -5.70E-05       | -3.91E-05 | 4.53E-06       |

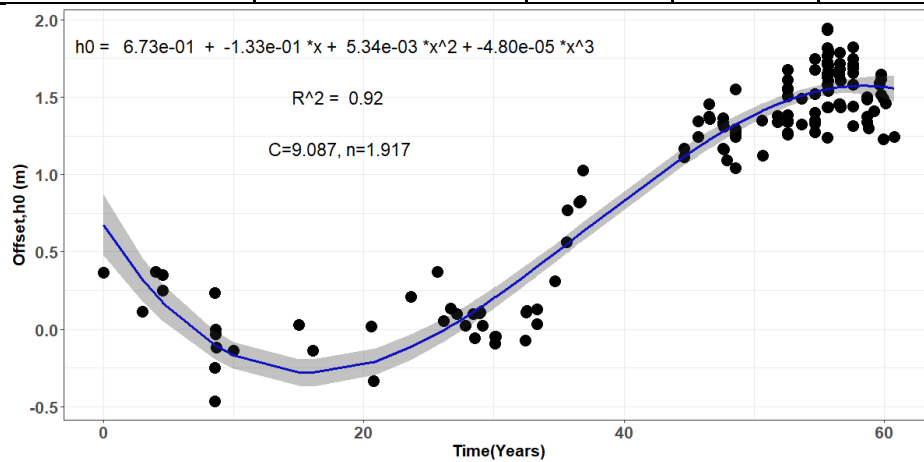

| (b) Ribb at Addis Zemen |  | C = 5.17, n = 2.139 |           |           | Confidence @95% |  |
|-------------------------|--|---------------------|-----------|-----------|-----------------|--|
|                         |  | coefficients        | 2.50%     | 97.50%    | standard error  |  |
| Intercept               |  | 1.05E+00            | 7.55E-01  | 1.34E+00  | 1.49E-01        |  |
| X1                      |  | -8.86E-02           | -1.24E-01 | -5.33E-02 | 1.78E-02        |  |
| X2                      |  | 7.14E-03            | 5.90E-03  | 8.38E-03  | 6.27E-04        |  |
| X3                      |  | -8.26E-05           | -9.52E-05 | -7.00E-05 | 6.38E-06        |  |

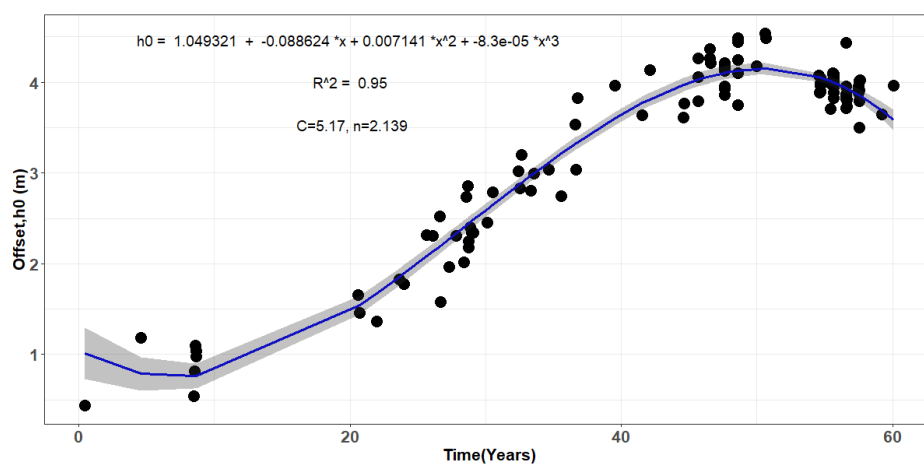

| (c) Gilgel Abbay at Bikolo |  | C = 39.89, n = 2.03 |           | Confidence @95% |                |
|----------------------------|--|---------------------|-----------|-----------------|----------------|
|                            |  | coefficients        | 2.50%     | 97.50%          | standard error |
| Intercept                  |  | 2.37E-01            | 1.93E-01  | 2.82E-01        | 2.16E-02       |
| X1                         |  | 1.01E-02            | 3.11E-03  | 1.70E-02        | 3.36E-03       |
| X2                         |  | -6.27E-04           | -9.03E-04 | -3.52E-04       | 1.33E-04       |
| X3                         |  | 8.95E-06            | 6.00E-06  | 1.19E-05        | 1.43E-06       |

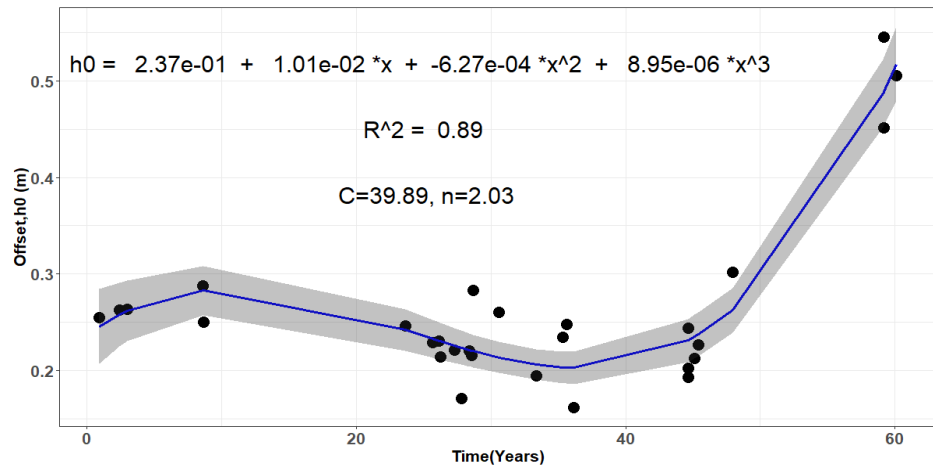

(d) Megech at G. Azezo

C = 29.48, n =  
2.49

Confidence @95%

|           | coefficients | 2.50%     | 97.50%    | standard error |
|-----------|--------------|-----------|-----------|----------------|
| Intercept | -6.26E-01    | 7.31E-01  | 5.21E-01  | 5.29E-02       |
| X1        | 1.03E-01     | 7.87E-02  | 1.26E-01  | 1.20E-02       |
| X2        | -3.64E-03    | -5.16E-03 | 2.13E-03  | 7.63E-04       |
| X3        | 7.80E-05     | 4.25E-05  | 1.14E-04  | 1.79E-05       |
| X4        | -1.00E-06    | -9.32E-07 | -3.78E-07 | 1.39E-07       |

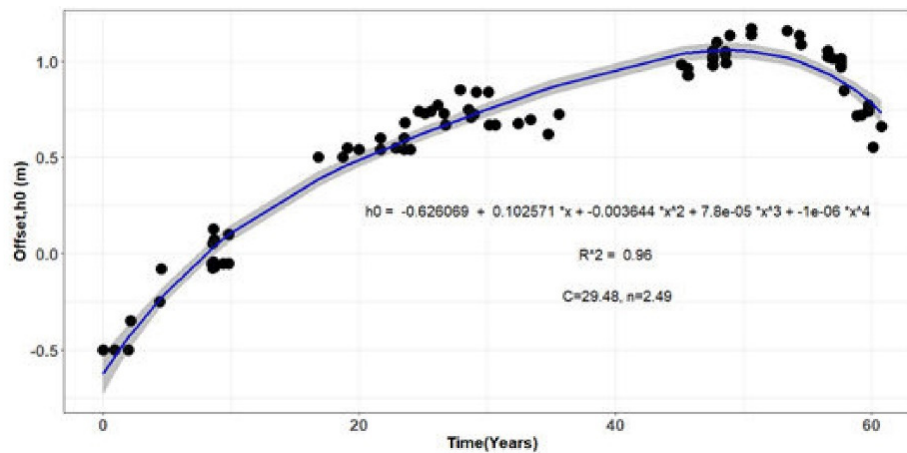

(e) Gelda at Ambessame

C = 17.60, n =  
2.50

Confidence @95%

|           | coefficients | 2.50%     | 97.50%    | standard error |
|-----------|--------------|-----------|-----------|----------------|
| Intercept | 3.32E-01     | 2.97E-01  | 3.67E-01  | 1.69E-02       |
| X1        | -2.00E-02    | -2.87E-02 | -1.14E-02 | 4.17E-03       |
| X2        | 1.11E-03     | 5.50E-04  | 1.66E-03  | 2.70E-04       |
| X3        | -1.60E-05    | -2.59E-05 | -6.02E-06 | 4.81E-06       |

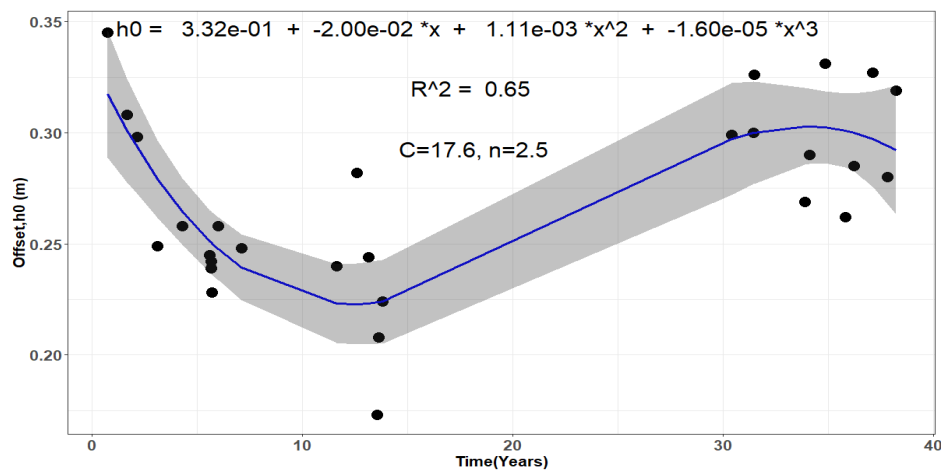

(f) Fogeda at Arb-Gebeya

C=13.77, n =  
2.86

Confidence @95%

|           | coefficients | 2.50%     | 97.50%    | standard error |
|-----------|--------------|-----------|-----------|----------------|
| Intercept | 2.28E-01     | 1.39E-01  | 3.16E-01  | 4.29E-02       |
| X1        | 8.58E-03     | -2.29E-03 | 1.94E-02  | 5.26E-03       |
| X2        | -4.18E-04    | -6.78E-04 | -1.58E-04 | 1.26E-04       |

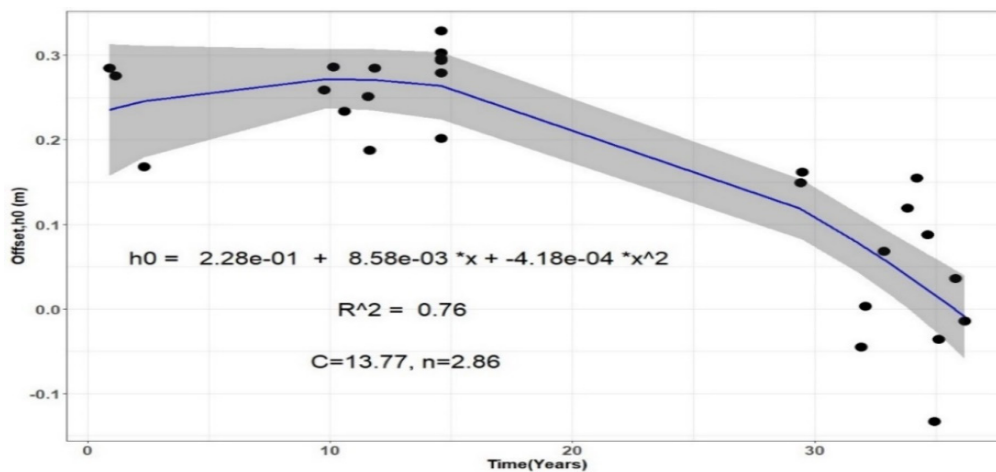

(g) Ribb at Gassay

C = 7.7, n = 2.20

Confidence @95%

|           | Coefficients | 2.50%     | 97.50%    | standard error |
|-----------|--------------|-----------|-----------|----------------|
| Intercept | 1.51E-01     | 1.30E-02  | 2.91E-01  | 6.49E-02       |
| X1        | -6.96E-02    | -1.00E-02 | -3.90E-02 | 1.43E-02       |
| X2        | 6.27E-03     | 4.36E-03  | 8.18E-03  | 8.92E-04       |
| X3        | -1.19E-04    | -1.53E-04 | -8.46E-05 | 1.60E-05       |

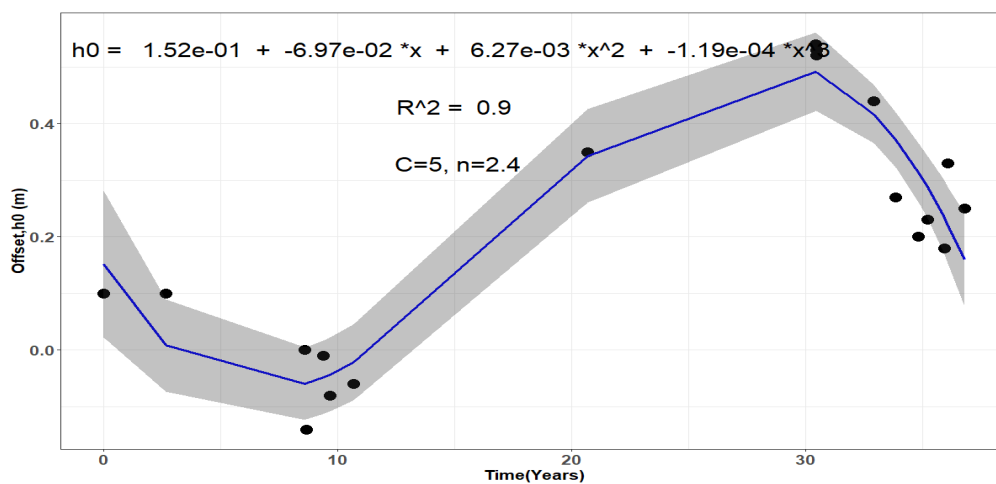

**(h) Upper Ribb nr Ibnat**

C = 34.60, n = 3.0

Confidence @95%

|           | coefficients | 2.50%     | 97.50%   | standard error |
|-----------|--------------|-----------|----------|----------------|
| Intercept | 1.03E+00     | 8.72E-01  | 1.19E+00 | 7.68E-02       |
| X1        | -7.92E-03    | -3.60E-02 | 2.01E-02 | 1.37E-02       |
| X2        | 4.07E-04     | -1.04E-03 | 1.86E-03 | 7.08E-04       |
| X3        | 8.13E-07     | -2.07E-05 | 2.24E-05 | 1.05E-05       |

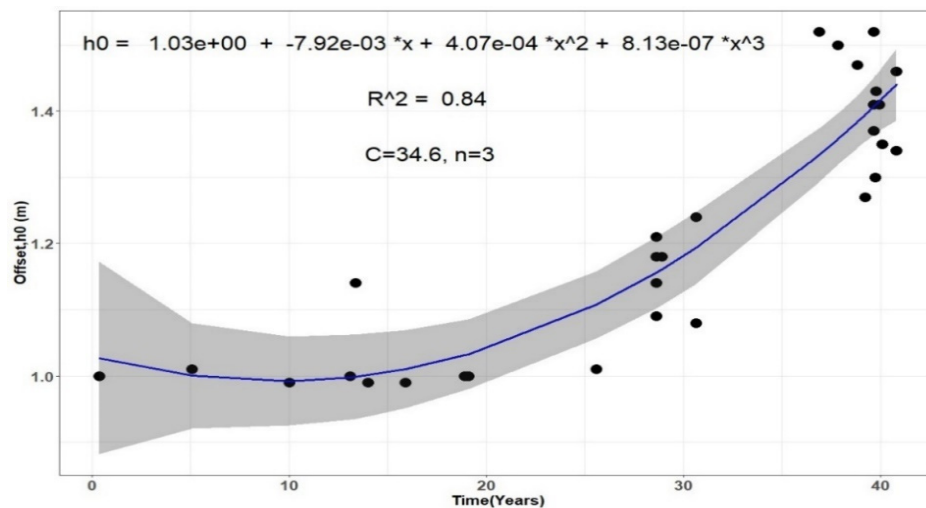**(i) Kirari nr Addis Zemen**

C = 42.71, n = 2.44

Confidence @95%

|           | coefficients | 2.50%     | 97.50%    | standard error |
|-----------|--------------|-----------|-----------|----------------|
| Intercept | 1.46E+00     | 1.38E+00  | 1.54E+00  | 3.88E-02       |
| X1        | 1.82E-01     | 1.06E-01  | 2.57E-01  | 3.59E-02       |
| X2        | -3.66E-02    | -5.25E-02 | -2.06E-02 | 7.58E-03       |

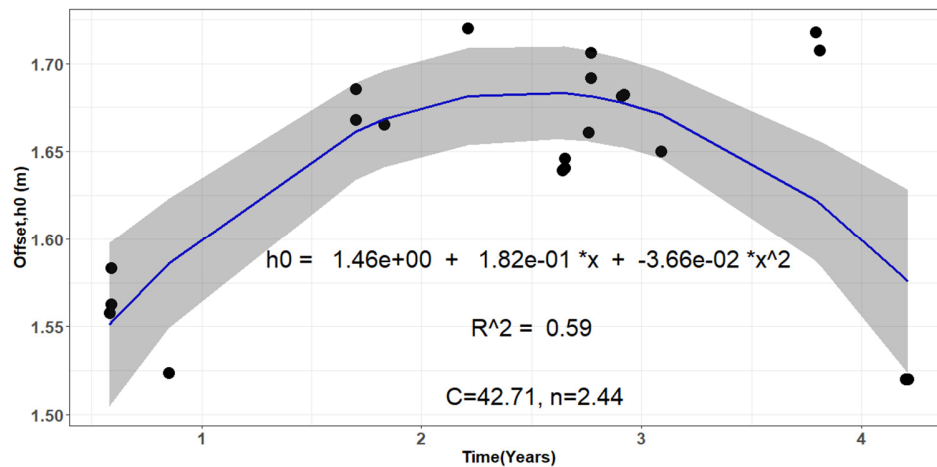

(j) Sheni nr Addis Zemen

C = 20, n = 2.2

Confidence @95%

|           | coefficients | 2.50%     | 97.50%    | standard error |
|-----------|--------------|-----------|-----------|----------------|
| Intercept | -2.000E-01   | -2.86E-01 | -1.15E-02 | 4.42E-02       |
| X1        | 4.14E-02     | 3.80E-02  | 4.49E-02  | 1.70E-03       |

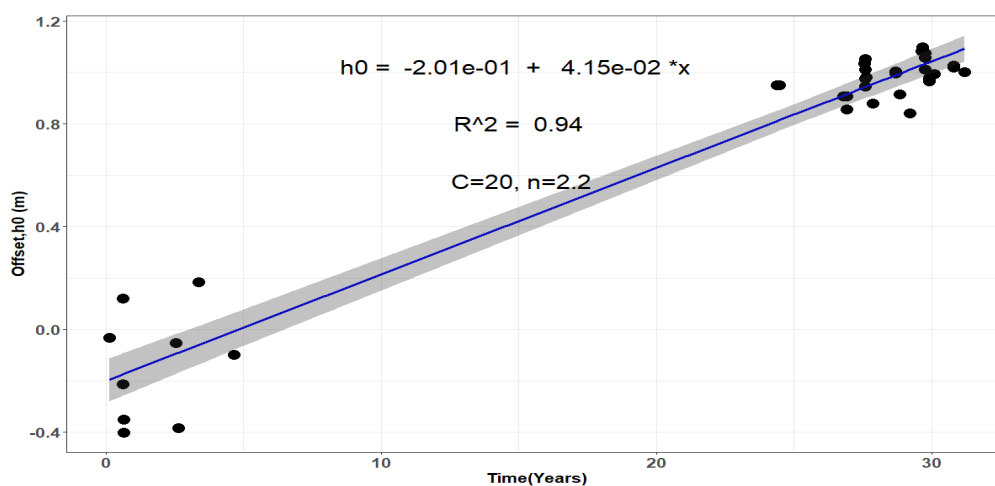

(k) Garno at Enfranz

C = 17.35, n = 2.0

Confidence @95%

|           | coefficients | 2.50%     | 97.50%   | standard error |
|-----------|--------------|-----------|----------|----------------|
| Intercept | -1.33E-01    | -4.22E-01 | 3.16E-01 | 1.81E-01       |
| X1        | 6.01E-02     | -7.36E-02 | 2.41E-01 | 7.74E-02       |
| X2        | 5.79E-03     | -1.57E-02 | 2.25E-02 | 9.38E-03       |
| X3        | -8.66E-04    | -1.59E-03 | 9.88E-06 | 3.93E-04       |

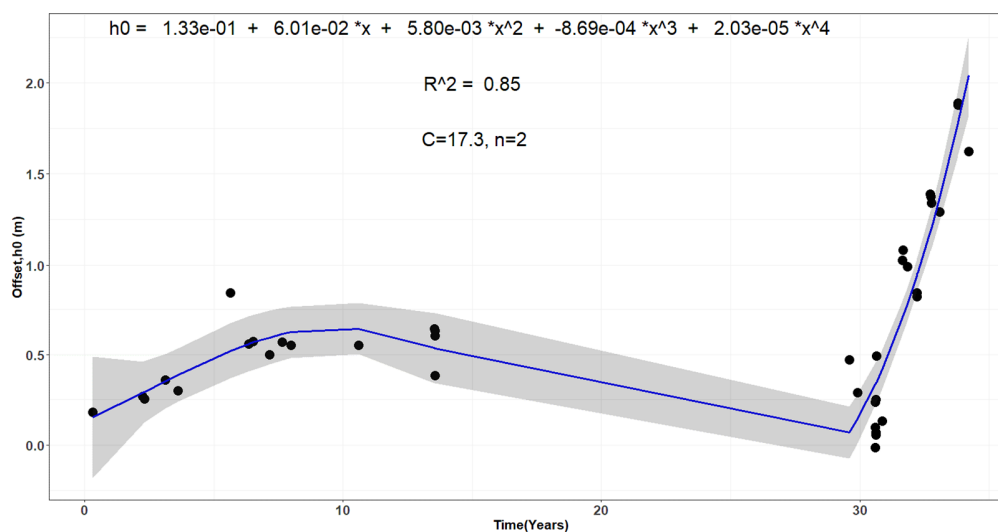

|    |          |          |          |          |
|----|----------|----------|----------|----------|
| X4 | 2.03E-05 | 8.60E-06 | 3.03E-05 | 5.34E-06 |
|----|----------|----------|----------|----------|



(l) Gumero at Maksegnit C = 35.15, n = 2.50 Confidence @95%

|           | coefficients | 2.50%     | 97.50%    | standard error |
|-----------|--------------|-----------|-----------|----------------|
| Intercept | 5.93E-01     | 5.23E-01  | 6.64E-01  | 3.45E-02       |
| X1        | 5.80E-02     | 3.41E-02  | 8.18E-02  | 1.17E-02       |
| X2        | -1.12E-02    | -1.37E-02 | -8.68E-03 | 1.24E-03       |
| X3        | 5.17E-04     | 4.18E-04  | 6.17E-04  | 4.88E-05       |
| X4        | -6.92E-06    | -8.21E-06 | -5.64E-06 | 6.32E-07       |

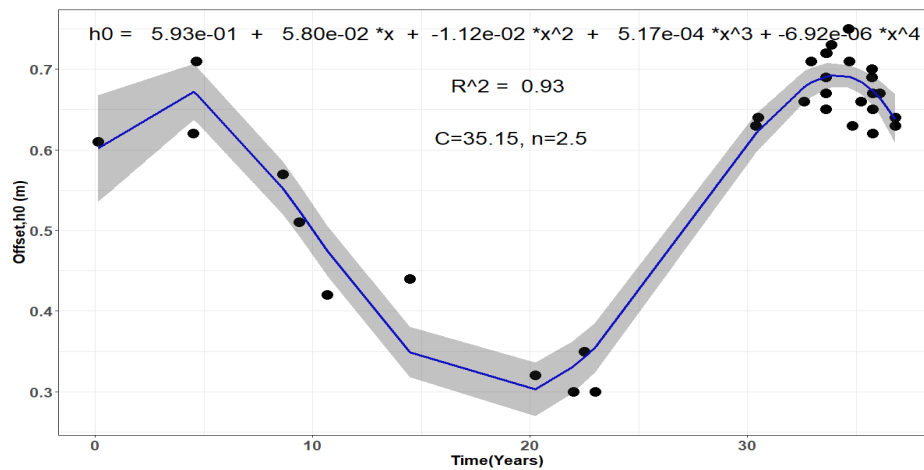

(m) Angereb at Gondar C = 58.86, n = 3.50 Confidence @95%

|           | coefficients | 2.50%     | 97.50%    | standard error |
|-----------|--------------|-----------|-----------|----------------|
| Intercept | 2.43E-01     | 2.14E-01  | 2.73E-01  | 1.48E-02       |
| X1        | -1.88E-02    | -2.62E-02 | -1.15E-02 | 3.69E-03       |
| X2        | 2.47E-03     | 2.05E-03  | 2.90E-03  | 2.13E-04       |
| X3        | -4.92E-05    | -5.59E-05 | -4.24E-05 | 3.37E-06       |

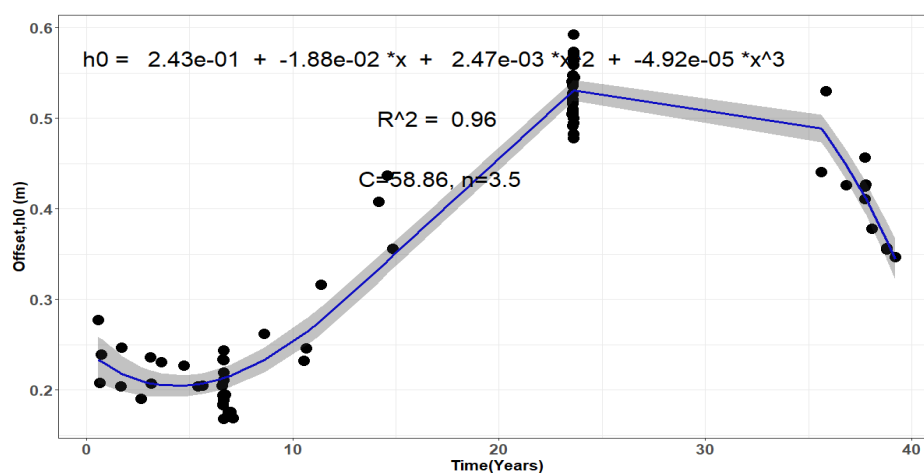

| (n) Dirma at Koladeba C=13.97, n = 2.04 Confidence @95% |              |           |          |                |
|---------------------------------------------------------|--------------|-----------|----------|----------------|
|                                                         | coefficients | 2.50%     | 97.50%   | standard error |
| Intercept                                               | 3.98E-01     | 3.12E-01  | 4.83E-01 | 4.21E-02       |
| X1                                                      | -7.65E-03    | -2.42E-02 | 8.85E-03 | 8.12E-03       |
| X2                                                      | 5.91E-04     | -9.00E-05 | 1.27E-03 | 3.35E-04       |

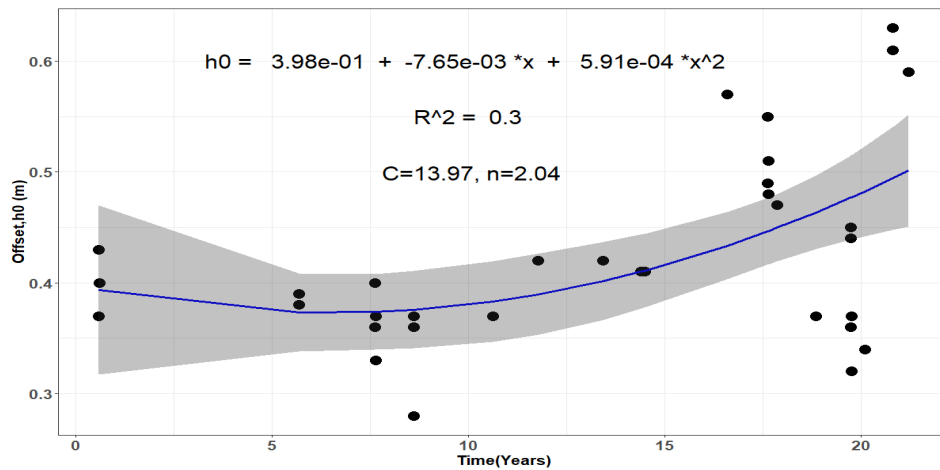

| (o) Jemma nr Bikolo C = 26.40, n = 2.60 Confidence @95% |              |           |           |                |
|---------------------------------------------------------|--------------|-----------|-----------|----------------|
|                                                         | coefficients | 2.50%     | 97.50%    | standard error |
| Intercept                                               | 4.24E-01     | 1.51E-01  | 6.96E-01  | 1.22E-01       |
| X1                                                      | -5.33E-01    | -1.01E+00 | -5.36E-02 | 2.15E-01       |
| X2                                                      | 3.30E-01     | 6.72E-02  | 5.93E-01  | 1.18E-01       |
| X3                                                      | -5.79E-02    | -1.03E-01 | -1.28E-02 | 2.02E-02       |

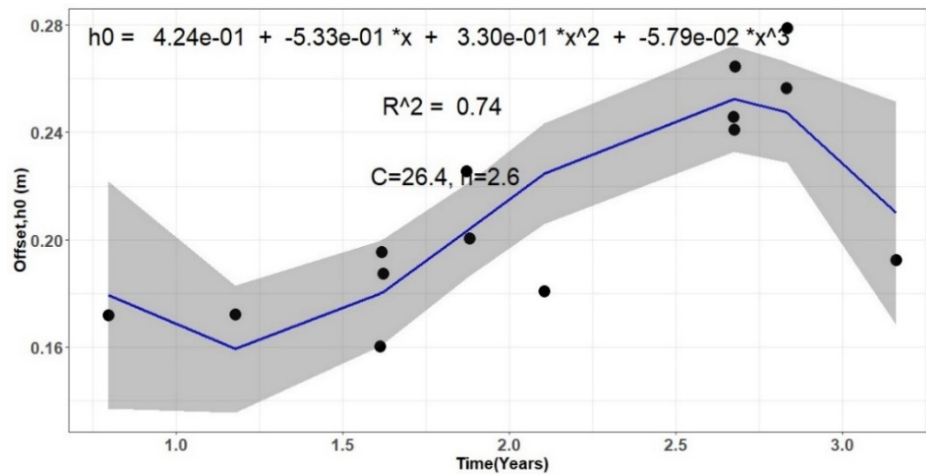

**(p) Koga at Bikolo**

C=35.96, n = 1.40

Confidence @95%

|           | coefficients | 2.50%     | 97.50%    | standard error |
|-----------|--------------|-----------|-----------|----------------|
| Intercept | 4.36E-01     | 4.13E-01  | 4.60E-01  | 1.18E-02       |
| X1        | 1.11E-02     | 6.53E-03  | 1.57E-02  | 2.28E-03       |
| X2        | -5.02E-04    | -6.59E-04 | -3.46E-04 | 7.79E-05       |

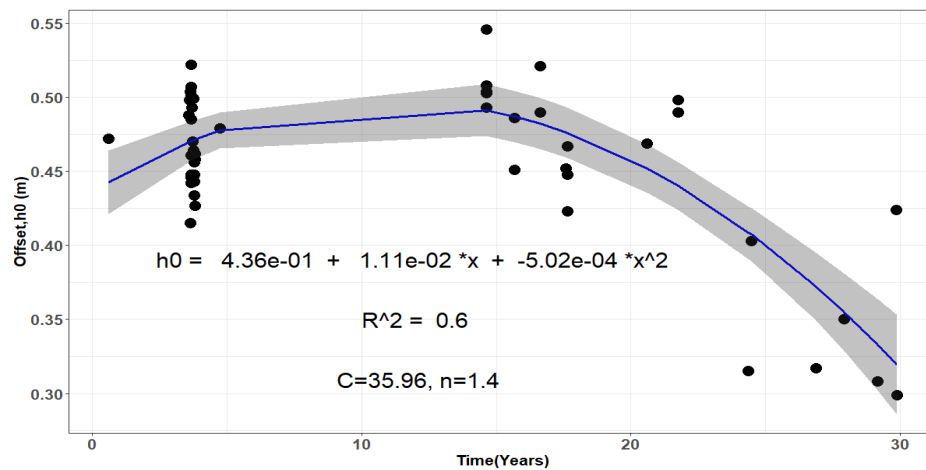**(q) Amen at Dangila**

C = 1.63, n = 3.20

Confidence @95%

|           | coefficients | 2.50%     | 97.50%    | standard error |
|-----------|--------------|-----------|-----------|----------------|
| Intercept | 1.81E-01     | 1.49E-01  | 2.14E-01  | 1.63E-02       |
| X1        | 1.37E-02     | 1.84E-03  | 2.56E-02  | 5.95E-03       |
| X2        | -2.75E-03    | -3.84E-03 | -1.66E-03 | 5.46E-04       |
| X3        | 8.70E-05     | 5.93E-05  | 1.14E-04  | 1.39E-05       |

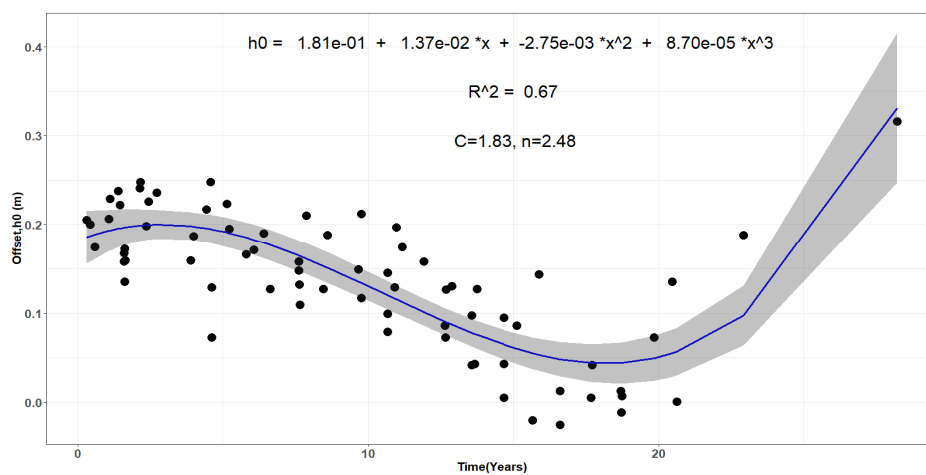

(r) Quashini nr Addis Kidane C = 1.91, n = 1.50 Confidence @95%

|           | coefficients | 2.50%     | 97.50%   | standard error |
|-----------|--------------|-----------|----------|----------------|
| Intercept | 2.62E-01     | 1.90E-01  | 3.34E-01 | 3.44E-02       |
| X1        | 2.41E-02     | 4.43E-03  | 4.37E-02 | 9.38E-03       |
| X2        | -1.08E-03    | -2.46E-03 | 3.09E-04 | 6.62E-04       |
| X3        | 1.44E-05     | -1.40E-05 | 4.28E-05 | 1.36E-05       |

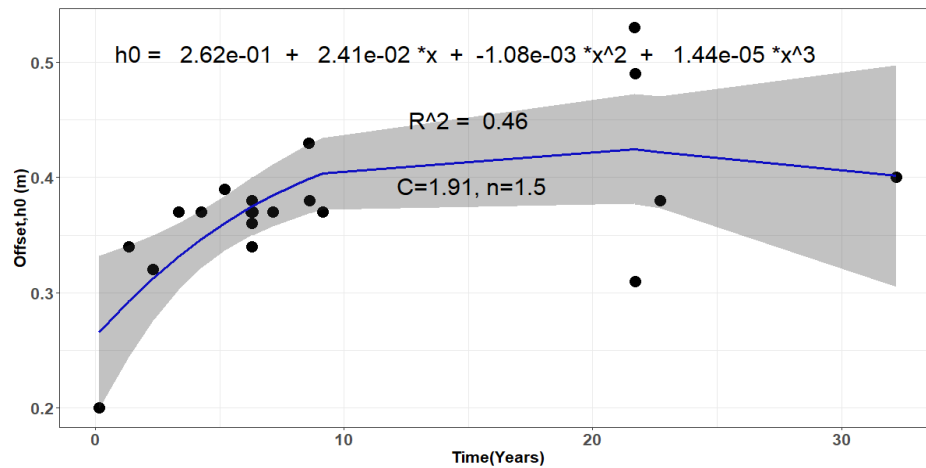

(s) Killitti nr Durebetie C = 16.36, n = 2.91 Confidence @95%

|           | coefficients | 2.50%     | 97.50%   | standard error |
|-----------|--------------|-----------|----------|----------------|
| Intercept | 1.18E+00     | 1.07E+00  | 1.28E+00 | 5.11E-02       |
| X1        | -3.21E-02    | -1.15E-01 | 5.11E-02 | 4.03E-02       |
| X2        | 3.55E-03     | -9.45E-03 | 1.66E-02 | 6.29E-03       |
| X3        | -1.53E-04    | -7.08E-04 | 4.02E-04 | 2.68E-04       |

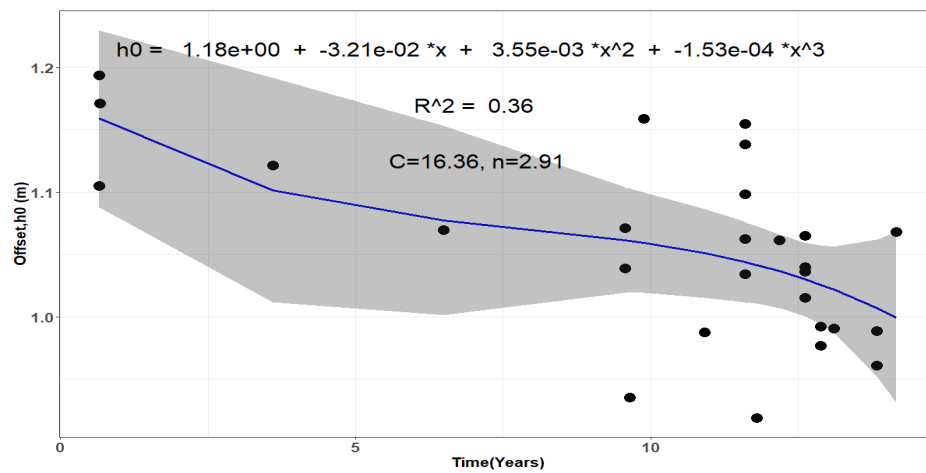

**(t) Gilgel Abbay at Chinba** **C = 7.30, n = 2.30** **Confidence@95%**

|           | coefficients | 2.50%     | 97.50%    | standard error |
|-----------|--------------|-----------|-----------|----------------|
| Intercept | -1.27E-01    | -2.11E-01 | -4.27E-02 | 4.19E-02       |
| X1        | 8.97E-02     | 4.84E-02  | 1.31E-01  | 2.06E-02       |
| X2        | -9.50E-03    | -1.40E-02 | -4.95E-03 | 2.27E-03       |

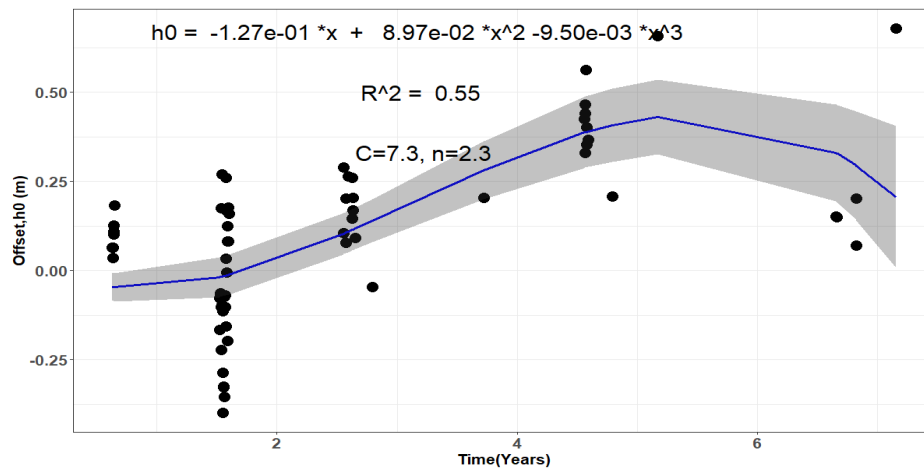

**(u) Abbay at Bahir Dar Peda** **C = 120.96, n = 2.26** **Confidence @95%**

|           | coefficients | 2.50%     | 97.50%   | standard error |
|-----------|--------------|-----------|----------|----------------|
| Intercept | 8.77E-01     | 7.89E-01  | 9.66E-01 | 4.26E-02       |
| X1        | 2.47E-02     | -2.08E-03 | 5.15E-02 | 1.29E-02       |
| X2        | -1.80E-03    | -3.91E-03 | 3.15E-04 | 1.02E-03       |
| X3        | 3.19E-05     | -1.24E-05 | 7.63E-05 | 2.13E-05       |

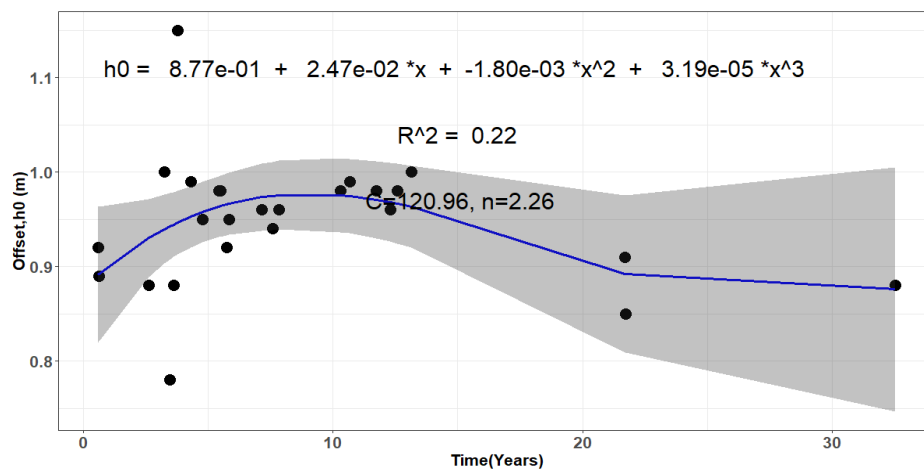

Supplement: s1 [file s1]
